# Supplementary material
Source: PubMed Central journal article supplement (PMC7403335)
Supplement: mmc1.pdf [file mmc1.pdf]

**YMTHE, Volume 28**

## **Supplemental Information**

### **Lentiviral-Vector-Based Dendritic Cell Vaccine**

### **Synergizes with Checkpoint Blockade**

### **to Clear Chronic Viral Infection**

**Thomas D. Norton, Takuya Tada, Rebecca Leibowitz, Verena van der Heide, Dirk Homann, and Nathaniel R. Landau**

**A.** **B.**

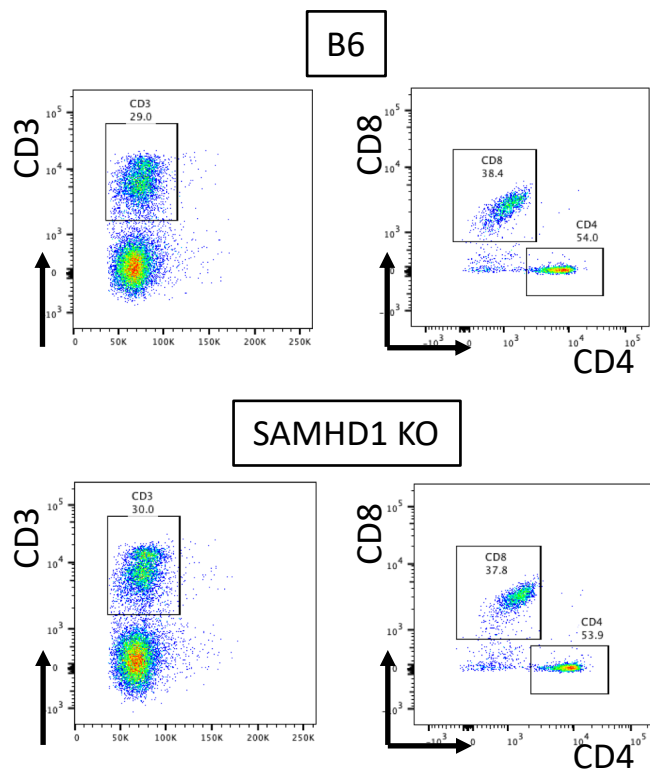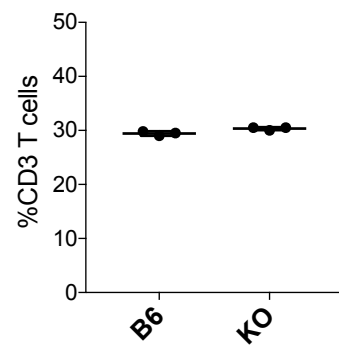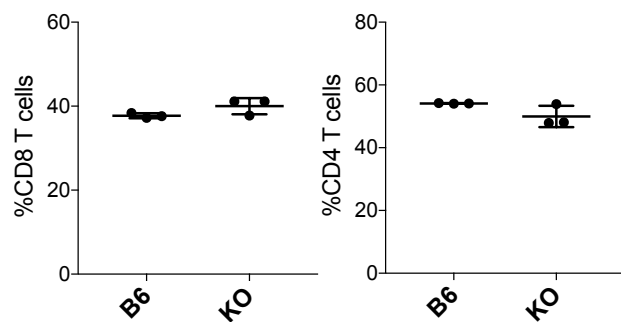

**C.**

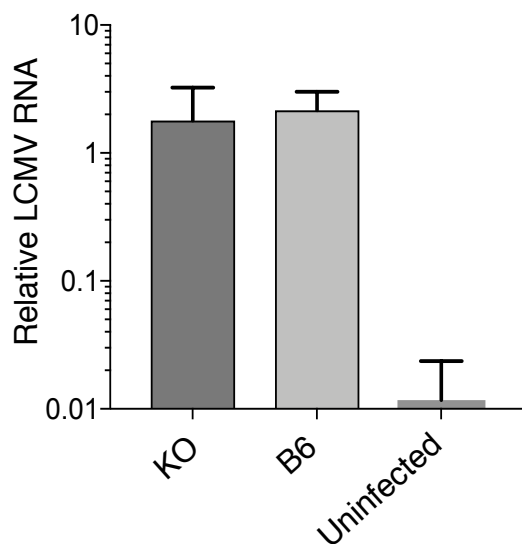

**Figure S1. SAMHD1 knock-out mice have normal T cell subsets and support similar levels of LCMV replication.**

A. Naïve B6 and SAMHD1 knockout mouse splenocytes were analyzed by flow cytometry for CD3, CD8 and CD4. Representative results from one mouse of each genotype are shown B. Results from three mice of each genotype are quantified. C. Viral RNA load four days post-infection with LCMV Arm i.p. in wild-type and SAMHD1 knock-out spleens was determined by qRT-PCR is shown.

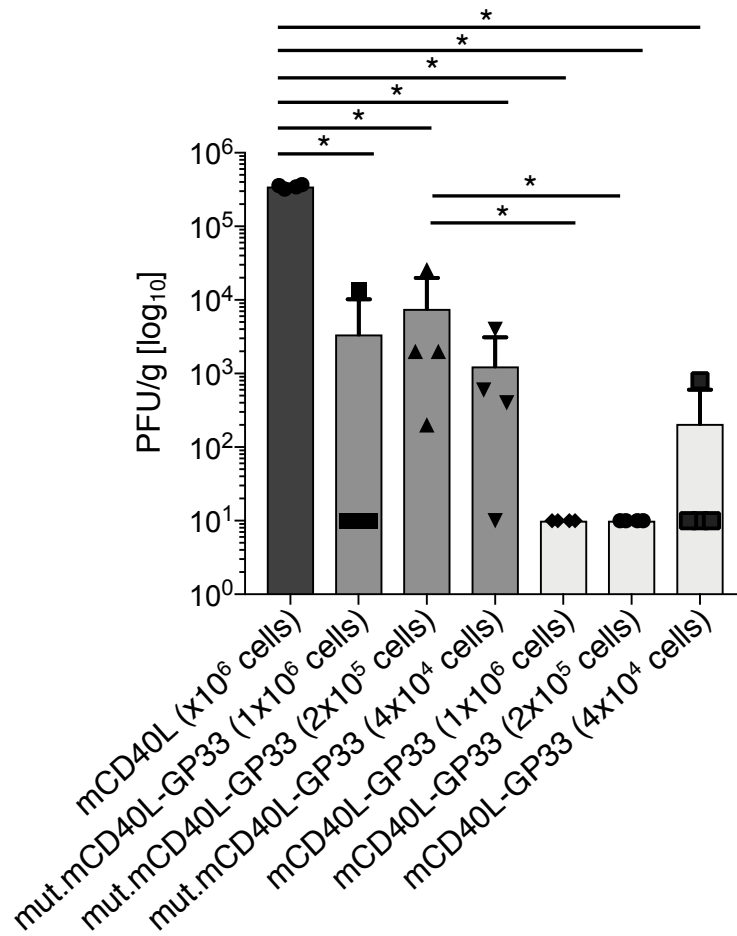

**Figure S2. CD40L expression by the transduced BMDCs strengthens the antiviral response.** BMDCs from B6 and SAMHD1 knockout mice were transduced with lentiviral expression vectors for mCD40, mutated mCD40L or mCD40L-GP33 virus at MOI=5. The mice were injected with different numbers of transduced DCs for 1 week and challenged with LCMV Armstrong. After 4 days, virus load in the spleen was measured by plaque assay (n=4).

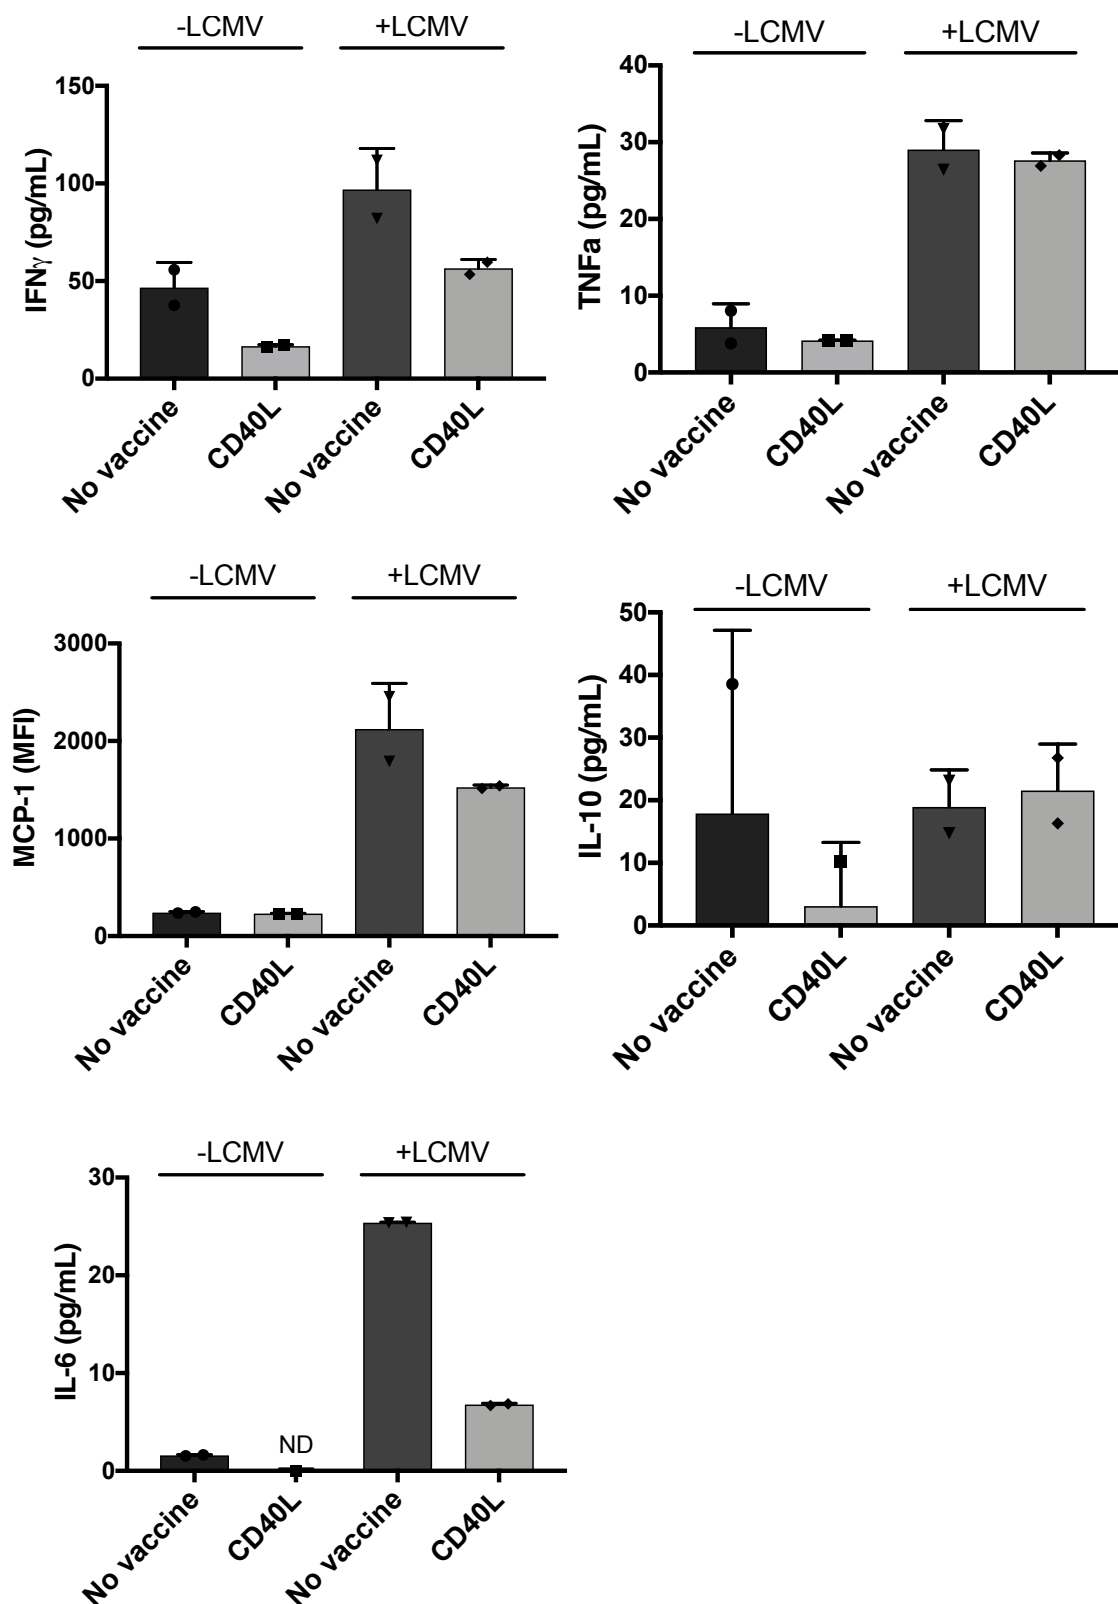

**Figure S3. CD40L expression by injected transduced BMDCs does not cause a generalized inflammatory response in LCMV infected or uninfected mice.** Wild-type mice were injected with CD40L lentiviral expression vector-transduced BMDCs. After 7 days, the mice were infected with LCMV Arm i.p. or left uninfected (n=2). Four days post-infection, serum levels of IFN $\gamma$ , TNF $\alpha$ , MCP-1, IL-10 and IL-6 were measured by cytokine bead array. The data are shown as the average of the duplicate measurements with bars indicating the standard error. ND is not detectable.
